# Supplementary material for: Developing a Competency Framework for Medical Laboratory Scientists in Taiwan: A Modified Delphi Approach
Source: Research Square preprint supplement (doi:10.21203/rs.3.rs-7370316/v1), 2025-10-08
Supplement: Supplementary file 1 [file 47bc335b86e2b89d0a6d9bae.docx]

**Supplementary file 1**

**Delphi Round 1 Questionnaire – Competency Framework for Medical Laboratory Scientists (MLS) in Taiwan**

**Instructions for Participants**

Thank you for participating in this Delphi survey. The purpose of this study is to establish a consensus-driven competency framework for Medical Laboratory Scientists (MLS) in Taiwan. The research team has synthesized five core competencies and fourteen sub-competencies for Taiwanese MLS through focus group interviews, literature review, and reference to competency standards published by professional MLS associations in other countries. We kindly ask you to provide your professional opinions on the appropriateness of each proposed competency for MLS training. Your evaluation will help us refine the wording, structure, and content of the preliminary draft of the indicators and criteria.

**Response Guidelines**

This study uses a 5-point Likert scale. Please rate the appropriateness of each core competency (Section A) and sub-competency (Section B) by checking the appropriate box: 5 = Very appropriate、4 = Appropriate、3 = Neutral、2 = Inappropriate、1 = Very inappropriate. If you have additional comments or suggestions, please write them in the “Comments” column. Your valuable input will make a significant contribution to this study. We sincerely appreciate your assistance. Please complete the questionnaire in full and return it within three weeks using the enclosed return envelope or by replying via email.

**Section A. Core competencies**

| **Core competencies** | **Very appropriate** | **Appropriate** | **Neutral** | **Inappropriate** | **Very inappropriate** | **Comments (suggestions or additional items)** |
| --- | --- | --- | --- | --- | --- | --- |
| **Technical Skill (TS)** |  |  |  |  |  |  |
| **Knowledge Base (KB)** |  |  |  |  |  |  |
| **Team Resource Management (TRM)** |  |  |  |  |  |  |
| **Continuous professional learning, Development and Quality improvement (CPQ)** |  |  |  |  |  |  |
| **Professionalism and Accountability (PA)** |  |  |  |  |  |  |

**Section B. Sub-competencies**

| **Sub-competencies** | **Very appropriate** | **Appropriate** | **Neutral** | **Inappropriate** | **Very inappropriate** | **Comments (suggestions or additional items)** |
| --- | --- | --- | --- | --- | --- | --- |
| **Collecting, preparing, and analyzing clinical specimens** |  |  |  |  |  |  |
| **Conducting quality control of laboratory tests** |  |  |  |  |  |  |
| **Validating and reporting laboratory results accurately and timely** |  |  |  |  |  |  |
| **Applying knowledge of laboratory medicine to support patient care** |  |  |  |  |  |  |
| **Utilizing healthcare information systems or software for documentation, data retrieval, calculation, and analysis** |  |  |  |  |  |  |
| **Maintaining documentation, equipment, laboratory resources, and inventory** |  |  |  |  |  |  |
| **Maintaining and promoting safe laboratory practices** |  |  |  |  |  |  |
| **Communicating effectively with colleagues, patients, families, caregivers, and healthcare team members to improve service quality** |  |  |  |  |  |  |
| **Supervising and managing personnel** |  |  |  |  |  |  |
| **Identifying professional learning needs and participating in continuing education and team training** |  |  |  |  |  |  |
| **Participate in research and development activities** |  |  |  |  |  |  |
| **Applying critical thinking to solve clinical problems, make informed decisions, and provide laboratory consultation** |  |  |  |  |  |  |
| **Understanding and adhering to accreditation standards, assessment regulations, and national laws governing medical laboratories** |  |  |  |  |  |  |
| **Demonstrating professional responsibility, ethical behavior, and integrity in medical laboratory practice** |  |  |  |  |  |  |

**Supplementary file 2**

**Delphi Round 2 Questionnaire – Competency Framework for Medical Laboratory Scientists (MLS) in Taiwan**

**Instructions for Participants**

Thank you again for participating in the second round of this Delphi survey on establishing a consensus-driven competency framework for Medical Laboratory Scientists (MLS) in Taiwan. This questionnaire is based on the valuable suggestions provided by experts in the first round. Statistical analyses and summarized feedback from Round 1 are presented here, along with your own responses from Round 1, for your reference in completing this round.

**Response Guidelines**

1. For each item, this round provides:
2. Your response in Round 1.
3. The mean score and standard deviation (SD) from Round 1, showing the degree of consensus or variability among experts.
4. Mean: The average value of experts’ ratings, representing the central tendency of responses.
5. SD: The standard deviation, indicating the extent of variability in experts’ opinions on appropriateness.
6. Symbols:
7. # indicates the item was revised after Round 1.
8. ☆ indicates a newly added item.
9. This study uses a 5-point Likert scale. Please rate the appropriateness of each core competency (Section A) and sub-competency (Section B) by checking the appropriate box: 5 = Very appropriate、4 = Appropriate、3 = Neutral、2 = Inappropriate、1 = Very inappropriate. If you have additional comments or suggestions, please write them in the “Comments” column. Your valuable input will make a significant contribution to this study. We sincerely appreciate your assistance. Please complete the questionnaire in full and return it within three weeks using the enclosed return envelope or by replying via email.

**Section A. Core competencies**

| **Core competencies** | **Round 1 Mean** | **Round 1 SD** | **Your Round 1 scores** | **Your Current Response (Round 2)** | | | | | **Comments (suggestions or additional items)** |
| --- | --- | --- | --- | --- | --- | --- | --- | --- | --- |
| **Very appropriate** | **Appropriate** | **Neutral** | **Inappropriate** | **Very inappropriate** |
| **Technical Skill (TS)** |  |  |  |  |  |  |  |  |  |
| **Knowledge Base (KB)** |  |  |  |  |  |  |  |  |  |
| **#Communication (COM)** |  |  |  |  |  |  |  |  |  |
| **#Continuous Professional Development (CPD)** |  |  |  |  |  |  |  |  |  |
| **#Professionalism (PRO)** |  |  |  |  |  |  |  |  |  |

**Section B. Sub-competencies**

| **Sub-competencies** | **Round 1 Mean** | **Round 1 SD** | **Your Round 1 scores** | **Your Current Response (Round 2)** | | | | | **Comments (suggestions or additional items)** |
| --- | --- | --- | --- | --- | --- | --- | --- | --- | --- |
| **Very appropriate** | **Appropriate** | **Neutral** | **Inappropriate** | **Very inappropriate** |
| **Collecting and preparing clinical specimens** |  |  |  |  |  |  |  |  |  |
| ☆**Performing laboratory analyses and preserving specimens** |  |  |  |  |  |  |  |  |  |
| **#Applying quality assurance principles to conduct laboratory quality control** |  |  |  |  |  |  |  |  |  |
| **Validating and reporting laboratory results accurately and timely** |  |  |  |  |  |  |  |  |  |
| **Applying knowledge of laboratory medicine to support patient care** |  |  |  |  |  |  |  |  |  |
| **Utilizing healthcare information systems or software for documentation, data retrieval, calculation, and analysis** |  |  |  |  |  |  |  |  |  |
| **#Establishing, managing, and maintaining documentation, equipment, laboratory resources, and inventory** |  |  |  |  |  |  |  |  |  |
| **Maintaining and promoting safe laboratory practices** |  |  |  |  |  |  |  |  |  |
| **Communicating effectively with colleagues, patients, families, caregivers, and healthcare team members to improve service quality** |  |  |  |  |  |  |  |  |  |
| **#Managing and utilizing human resources effectively in laboratory settings** |  |  |  |  |  |  |  |  |  |
| **Identifying professional learning needs and participating in continuing education and team training** |  |  |  |  |  |  |  |  |  |
| **#Demonstrating logical reasoning, scientific inquiry, and research skills** |  |  |  |  |  |  |  |  |  |
| **Applying critical thinking to solve clinical problems, make informed decisions, and provide laboratory consultation** |  |  |  |  |  |  |  |  |  |
| **Understanding and adhering to accreditation standards, assessment regulations, and national laws governing medical laboratories** |  |  |  |  |  |  |  |  |  |
| **Demonstrating professional responsibility, ethical behavior, and integrity in medical laboratory practice** |  |  |  |  |  |  |  |  |  |

**Supplementary file 3**

**Delphi Round 3 Questionnaire – Competency Framework for Medical Laboratory Scientists (MLS) in Taiwan**

**Instructions for Participants**

Thank you again for participating in the third round of this Delphi survey on establishing a consensus-driven competency framework for Medical Laboratory Scientists (MLS) in Taiwan. This questionnaire is based on the valuable suggestions provided by experts in the second round. Statistical analyses and summarized feedback from Round 2 are presented here, along with your own responses from Round 2, for your reference in completing this round.

**Response Guidelines**

For each item, this round provides:

1. Your response in Round 2.
2. The mean score and standard deviation (SD) from Round 2, showing the degree of consensus or variability among experts.
3. Mean: The average value of experts’ ratings, representing the central tendency of responses.
4. SD: The standard deviation, indicating the extent of variability in experts’ opinions on appropriateness.
5. This study uses a 5-point Likert scale. Please rate the appropriateness of each core competency (Section A) and sub-competency (Section B) by checking the appropriate box: 5 = Very appropriate、4 = Appropriate、3 = Neutral、2 = Inappropriate、1 = Very inappropriate. If you have additional comments or suggestions, please write them in the “Comments” column. Your valuable input will make a significant contribution to this study. We sincerely appreciate your assistance. Please complete the questionnaire in full and return it within three weeks using the enclosed return envelope or by replying via email.

**Section A. Core competencies**

| **Core competencies** | **Round 2 Mean** | **Round 2 SD** | **Your Round 2 scores** | **Your Current Response (Round 3)** | | | | | **Comments (suggestions or additional items)** |
| --- | --- | --- | --- | --- | --- | --- | --- | --- | --- |
| **Very appropriate** | **Appropriate** | **Neutral** | **Inappropriate** | **Very inappropriate** |
| **Technical Skill (TS)** |  |  |  |  |  |  |  |  |  |
| **Knowledge Base (KB)** |  |  |  |  |  |  |  |  |  |
| **Communication (COM)** |  |  |  |  |  |  |  |  |  |
| **Continuous Professional Development (CPD)** |  |  |  |  |  |  |  |  |  |
| **Professionalism (PRO)** |  |  |  |  |  |  |  |  |  |

**Section B. Sub-competencies**

| **Sub-competencies** | **Round 2 Mean** | **Round 2 SD** | **Your Round 2 scores** | **Your Current Response (Round 3)** | | | | | **Comments (suggestions or additional items)** |
| --- | --- | --- | --- | --- | --- | --- | --- | --- | --- |
| **Very appropriate** | **Appropriate** | **Neutral** | **Inappropriate** | **Very inappropriate** |
| **Collecting and preparing clinical specimens** |  |  |  |  |  |  |  |  |  |
| **Performing laboratory analyses and preserving specimens** |  |  |  |  |  |  |  |  |  |
| **Applying quality assurance principles to conduct laboratory quality control** |  |  |  |  |  |  |  |  |  |
| **Validating and reporting laboratory results accurately and timely** |  |  |  |  |  |  |  |  |  |
| **Applying knowledge of laboratory medicine to support patient care** |  |  |  |  |  |  |  |  |  |
| **Utilizing healthcare information systems or software for documentation, data retrieval, calculation, and analysis** |  |  |  |  |  |  |  |  |  |
| **Establishing, managing, and maintaining documentation, equipment, laboratory resources, and inventory** |  |  |  |  |  |  |  |  |  |
| **Maintaining and promoting safe laboratory practices** |  |  |  |  |  |  |  |  |  |
| **Communicating effectively with colleagues, patients, families, caregivers, and healthcare team members to improve service quality** |  |  |  |  |  |  |  |  |  |
| **Managing and utilizing human resources effectively in laboratory settings** |  |  |  |  |  |  |  |  |  |
| **Identifying professional learning needs and participating in continuing education and team training** |  |  |  |  |  |  |  |  |  |
| **Demonstrating logical reasoning, scientific inquiry, and research skills** |  |  |  |  |  |  |  |  |  |
| **Applying critical thinking to solve clinical problems, make informed decisions, and provide laboratory consultation** |  |  |  |  |  |  |  |  |  |
| **Understanding and adhering to accreditation standards, assessment regulations, and national laws governing medical laboratories** |  |  |  |  |  |  |  |  |  |
| **Demonstrating professional responsibility, ethical behavior, and integrity in medical laboratory practice** |  |  |  |  |  |  |  |  |  |
